# Supplementary material for: Inhibition of Thermus thermophilus HB8 thioredoxin activity by platinum(ii)
Source: Royal Society of Chemistry journal article supplement (doi:10.1039/b419119f), 2005-01-01
Supplement: b419119f.pdf [file b419119f.pdf]

# **Inhibition of *Thermus thermophilus* HB8 thioredoxin activity by platinum(II) complex**

**Masahiro Kato,<sup>a</sup> Hitoshi Yamamoto,<sup>ac</sup> Taka-aki Okamura,<sup>a</sup> Nobuko Maoka,<sup>c</sup> Ryoji Masui,<sup>bc</sup>  
Seiki Kuramitsu,<sup>bc</sup> and Norikazu Ueyama<sup>\*a</sup>**

<sup>a</sup>*Department of Macromolecular Science, Graduate School of Science, Osaka University, Toyonaka, Osaka  
560-0043, Japan*

<sup>b</sup>*Department of Biology, Graduate School of Science, Osaka University, Toyonaka, Osaka 560-0043, Japan*

<sup>c</sup>*the RIKEN Harima Institute/SPring-8, 1-1-1 Koto, Mikazuki-cho, Sayo-gun, Hyogo 679-5148, Japan.*

*E-mail: ueyama@chem.sci.osaka-u.ac.jp*

The supporting information encompasses Fig. S1-S4. Fig. S1 displays the MALDI-TOF MS spectra for confirming the purification of Thioredoxin-Platinum Complex; Fig. S2 and S3 show the UV-visible spectrum and the MALDI-TOF MS spectra for identifying the existence of the Pt-S bond; and Fig. S4 displays the LIFT TOF/TOF MS spectrum (parent mass:  $m/z = 1265.366$ ) for confirming the binding site of the platinum(II) complex in thioredoxin.

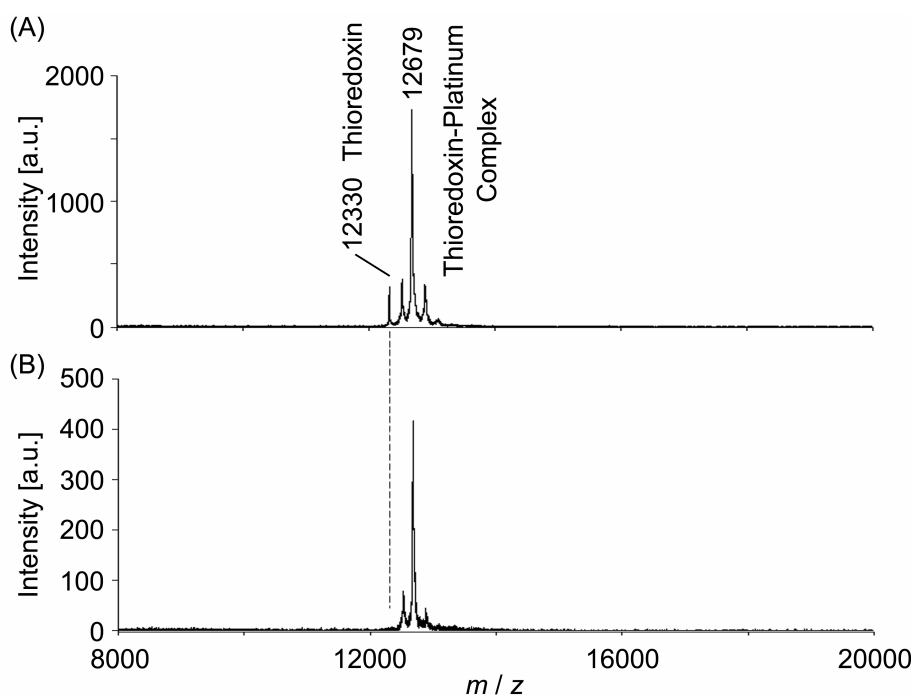

**Fig. 1** MALDI-TOF MS spectra of Thioredoxin-Platinum Complex (A) before and (B) after purification by 6% Native-polyacrylamide gel electrophoresis (PAGE).

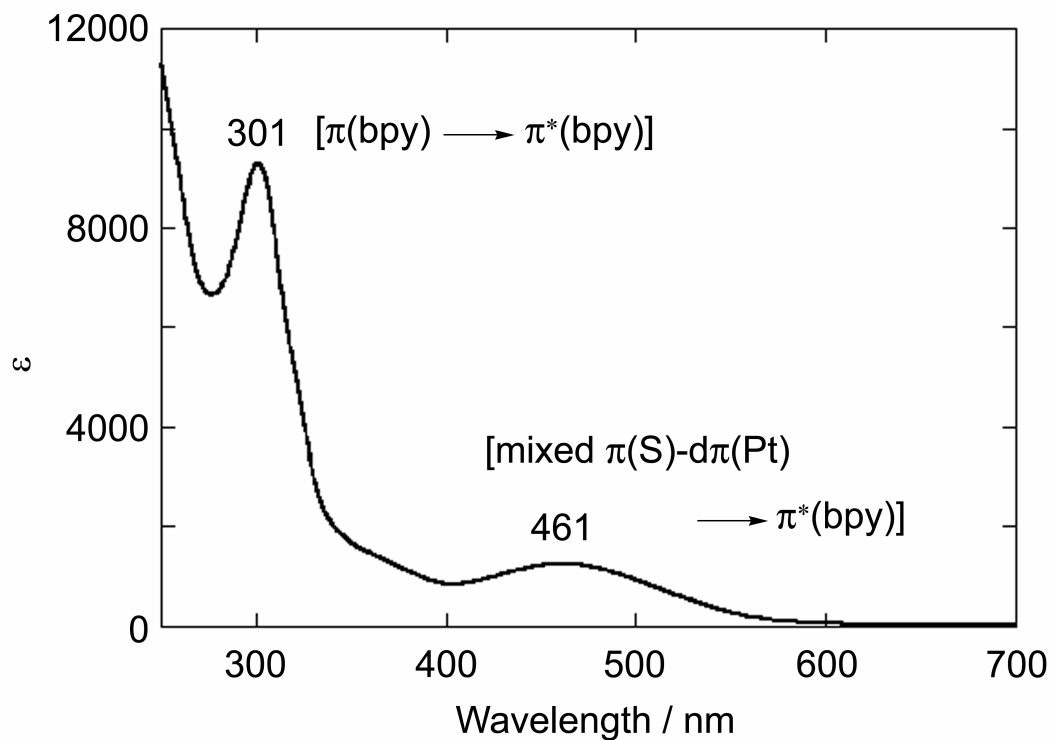

**Fig. S2** UV-visible spectrum of  $[\text{Pt}(\text{bpy})(\text{Z-cys-Pro-Leu-cys-OMe})]$  in methanol at 30°C.

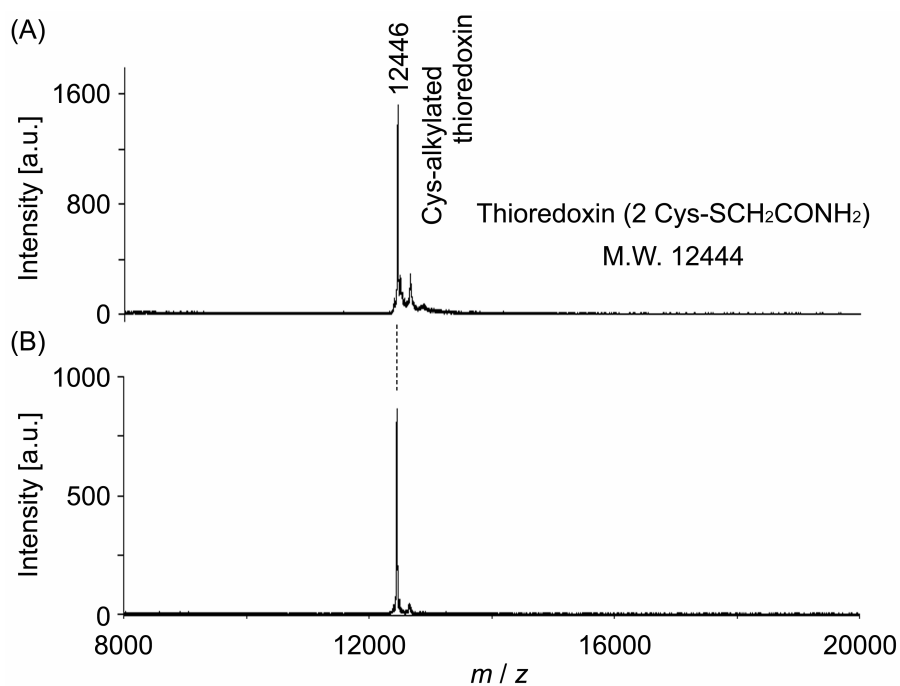

**Fig. 3** MALDI-TOF MS spectra of (A) thioredoxin alkylated by iodoacetamide and (B) after mixing with  $\text{Pt}(\text{bpy})(\text{en})^{2+}$ .

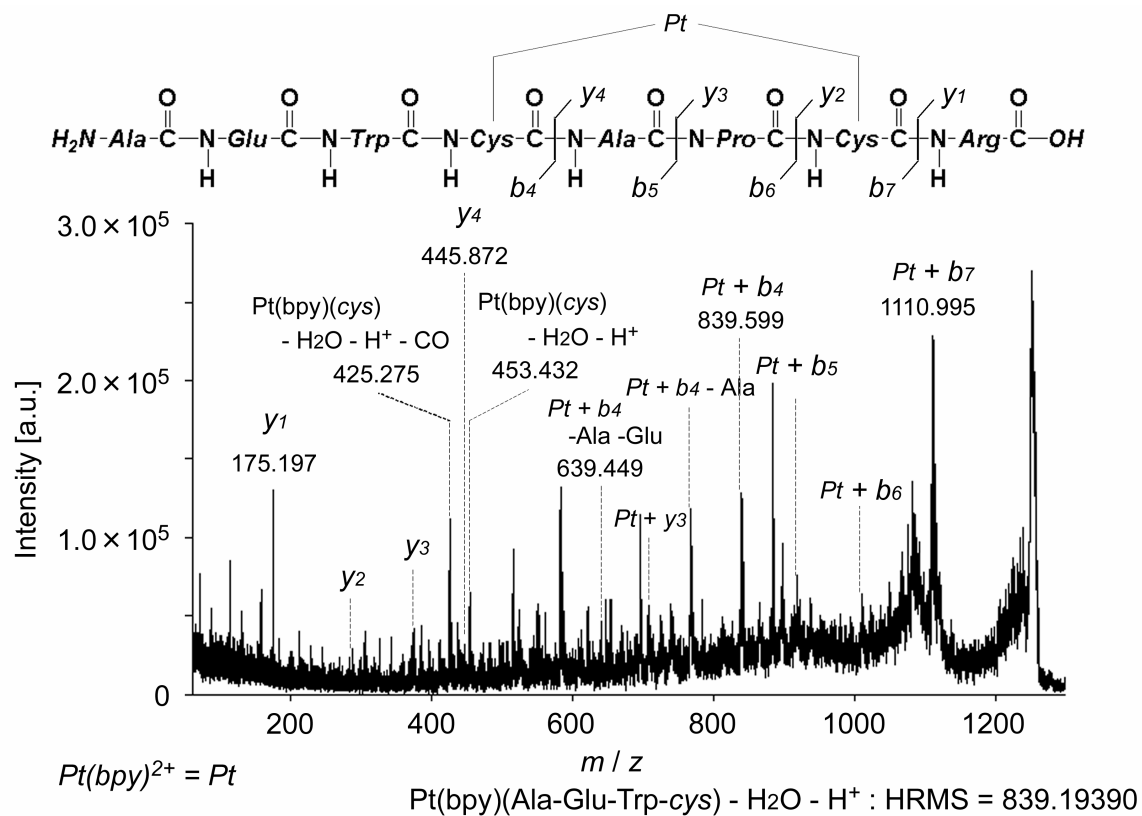

**Fig. S4.** LIFT-TOF/TOF MS spectrum of Thioredoxin-Platinum Complex digested by chymotrypsin (parent mass:  $m/z = 1265.366$ ).
